# Supplementary material for: Integrating Computational and Experimental Methods to Identify Novel Sweet Peptides from Egg and Soy Proteins
Source: MDPI journal article supplement (doi:10.3390/ijms25105430), 2024-05-16
Supplement: s1 [file s1]

Table S1

| Peptide | Bioactive |
|---------|-----------|
| CW      | 0.99581   |
| MW      | 0.995312  |
| GF      | 0.994712  |
| CMW     | 0.993837  |
| GW      | 0.993164  |
| PW      | 0.992911  |
| LF      | 0.986934  |
| LW      | 0.985244  |
| LMF     | 0.979926  |
| RPF     | 0.977766  |
| PFPY    | 0.969077  |
| APW     | 0.966955  |
| CPPSF   | 0.96497   |
| WMA     | 0.961852  |
| AGW     | 0.959298  |
| MDF     | 0.959246  |
| CPCR    | 0.949732  |
| IF      | 0.949173  |
| SF      | 0.948796  |
| QF      | 0.946135  |
| IW      | 0.944175  |
| NF      | 0.941145  |
| DGF     | 0.939426  |
| HGF     | 0.938552  |
| PDF     | 0.934107  |
| SW      | 0.93391   |
| DW      | 0.933025  |
| CG      | 0.931922  |
| QW      | 0.928524  |
| GP      | 0.905487  |
| HPIW    | 0.896869  |
| ML      | 0.894564  |
| GG      | 0.88736   |
| PP      | 0.886915  |
| LMP     | 0.886515  |
| WPVL    | 0.880808  |
| EGCW    | 0.876556  |
| HPNF    | 0.875719  |
| CR      | 0.865233  |

|        |          |
|--------|----------|
| PGL    | 0.855192 |
| ADPNF  | 0.852384 |
| MR     | 0.849148 |
| GGL    | 0.838635 |
| CY     | 0.831032 |
| MDSF   | 0.829954 |
| EMW    | 0.82038  |
| SHW    | 0.816324 |
| VF     | 0.815398 |
| NGDW   | 0.815121 |
| TW     | 0.814447 |
| GGR    | 0.81127  |
| GL     | 0.808777 |
| SIF    | 0.805497 |
| MEW    | 0.801147 |
| PR     | 0.787626 |
| LGP    | 0.786814 |
| DSWPSL | 0.785783 |
| DNF    | 0.775374 |
| GR     | 0.766288 |
| ISW    | 0.757343 |
| INPYPR | 0.756391 |
| YPR    | 0.754834 |
| QNCMY  | 0.75044  |
| INF    | 0.749347 |
| AM     | 0.74549  |
| SQF    | 0.743007 |
| GSM    | 0.742395 |
| GY     | 0.741592 |
| PPA    | 0.738574 |
| SSW    | 0.731445 |
| GSMGY  | 0.728079 |
| CDGY   | 0.719177 |
| RPY    | 0.716662 |
| HGVF   | 0.702486 |
| APAP   | 0.70062  |
| SML    | 0.696547 |
| CSGHP  | 0.695588 |
| QWME   | 0.691206 |
| AMR    | 0.688815 |
| SSAMM  | 0.68653  |

|        |          |
|--------|----------|
| LDMGP  | 0.684233 |
| SSIW   | 0.68172  |
| LIGC   | 0.676497 |
| DML    | 0.667515 |
| LISW   | 0.665913 |
| AANW   | 0.66488  |
| NPG    | 0.664548 |
| LYPR   | 0.663945 |
| CH     | 0.660567 |
| CI     | 0.660168 |
| LGL    | 0.652338 |
| HSILMP | 0.649456 |
| DCY    | 0.64835  |
| CPK    | 0.648049 |
| MGD    | 0.644133 |
| IGG    | 0.642808 |
| AVW    | 0.63114  |
| CGGT   | 0.631018 |
| SC     | 0.620334 |
| LL     | 0.618551 |
| LKPTW  | 0.615503 |
| LHM    | 0.614823 |
| SGG    | 0.611845 |
| NM     | 0.604672 |
| CGGQR  | 0.603286 |
| TIGCAW | 0.601279 |
| CSL    | 0.601262 |
| NGMIR  | 0.599087 |
| CGSR   | 0.59867  |
| LHPGR  | 0.594419 |
| GDMDY  | 0.589397 |
| CSGHR  | 0.589257 |
| EW     | 0.585631 |
| LNMY   | 0.585134 |
| SGNIPY | 0.580003 |
| IVF    | 0.57343  |
| SVF    | 0.573302 |
| LAC    | 0.571138 |
| LR     | 0.569984 |
| MD     | 0.569594 |
| HP     | 0.566647 |

|        |          |
|--------|----------|
| GLPK   | 0.561671 |
| DVF    | 0.551408 |
| DLP    | 0.549727 |
| VDW    | 0.548779 |
| CQR    | 0.546227 |
| AMQL   | 0.545898 |
| NTW    | 0.543895 |
| CQ     | 0.540359 |
| AGY    | 0.540291 |
| SHHPR  | 0.538536 |
| PA     | 0.53447  |
| RPIR   | 0.532517 |
| IGR    | 0.532161 |
| NGNC   | 0.53085  |
| GH     | 0.530477 |
| HPNL   | 0.523186 |
| LGPK   | 0.516678 |
| LY     | 0.516639 |
| MTPR   | 0.515171 |
| SP     | 0.514894 |
| LQPY   | 0.51421  |
| CS     | 0.513886 |
| LAP    | 0.512708 |
| TCIC   | 0.510885 |
| SGR    | 0.508729 |
| ISCR   | 0.504779 |
| SAC    | 0.503776 |
| ACSY   | 0.501397 |
| LIPAIP | 0.500751 |

---

Table S2

| pepcalc | Sequence |
|---------|----------|
| 0       | SW       |
| 0       | SSIW     |
| 1       | SC       |
| 0       | SSW      |
| 1       | CS       |
| 0       | ACSY     |
| 1       | SP       |
| 0       | CY       |
| 0       | SAC      |
| 0       | SHW      |
| 0       | SSAMM    |
| 0       | GSMGY    |
| 0       | APW      |
| 0       | GSM      |
| 0       | SGNIPY   |
| 1       | CQ       |
| 0       | AANW     |
| 1       | GDMDY    |
| 0       | SML      |
| 0       | CG       |
| 0       | QW       |
| 1       | CPK      |
| 0       | HSILMP   |
| 0       | CSL      |
| 0       | CSGHP    |
| 0       | CPPSF    |
| 1       | CGSR     |
| 1       | GLPK     |
| 0       | APAP     |
| 0       | SQF      |
| 0       | AMQL     |
| 1       | SHHPR    |
| 1       | ADPNF    |
| 1       | DSWPSL   |
| 0       | NGNC     |
| 1       | SGR      |
| 1       | CGGQR    |
| 0       | AM       |
| 1       | EGCW     |

|   |        |
|---|--------|
| 1 | CPCR   |
| 0 | SF     |
| 0 | CMW    |
| 0 | AGW    |
| 1 | CSGHR  |
| 0 | GW     |
| 1 | SGG    |
| 0 | GP     |
| 0 | TW     |
| 0 | CGGT   |
| 0 | LKPTW  |
| 0 | AGY    |
| 0 | NTW    |
| 0 | NM     |
| 1 | NGDW   |
| 1 | GR     |
| 1 | LGPK   |
| 0 | GH     |
| 1 | GGR    |
| 1 | INPYPR |
| 1 | CQR    |
| 1 | NGMIR  |
| 1 | QWME   |
| 1 | YPR    |
| 0 | SIF    |
| 0 | GGL    |
| 0 | CI     |
| 1 | DW     |
| 1 | CDGY   |
| 0 | PW     |
| 0 | LAC    |
| 0 | GF     |
| 0 | GG     |
| 0 | AVW    |
| 1 | ISCR   |
| 0 | PA     |
| 0 | NPG    |
| 0 | TIGCAW |
| 0 | GL     |
| 0 | PGL    |
| 1 | DGF    |

|   |        |
|---|--------|
| 1 | EW     |
| 0 | LAP    |
| 0 | TCIC   |
| 0 | HPNL   |
| 1 | CR     |
| 1 | VDW    |
| 0 | IGG    |
| 0 | SVF    |
| 0 | LGP    |
| 1 | RPY    |
| 1 | IGR    |
| 1 | PDF    |
| 0 | PPA    |
| 0 | HGVF   |
| 1 | LDMGP  |
| 1 | DCY    |
| 1 | DNF    |
| 0 | WPVL   |
| 0 | LIGC   |
| 0 | ISW    |
| 1 | AMR    |
| 0 | LIPAIP |
| 0 | HGF    |
| 1 | DLP    |
| 1 | EMW    |
| 1 | MGD    |
| 1 | LHPGR  |
| 0 | WMA    |
| 1 | DVF    |
| 0 | VF     |
| 1 | LYPR   |
| 0 | QNCMY  |
| 0 | LISW   |
| 1 | DML    |
| 0 | NF     |
| 0 | LGL    |
| 1 | RPIR   |
| 0 | GY     |
| 1 | PR     |
| 0 | LL     |
| 1 | MD     |

|   |      |
|---|------|
| 0 | LW   |
| 1 | LR   |
| 0 | IVF  |
| 0 | ML   |
| 0 | HPIW |
| 0 | PP   |
| 0 | IW   |
| 0 | LQPY |
| 0 | HPNF |
| 0 | LHM  |
| 0 | LMP  |
| 0 | CH   |
| 1 | MEW  |
| 1 | MTPR |
| 0 | IF   |
| 1 | MDF  |
| 0 | INF  |
| 0 | LF   |
| 0 | RPF  |
| 0 | HP   |
| 0 | LMF  |
| 1 | MDSF |
| 0 | LY   |
| 0 | MR   |
| 0 | LNMY |
| 0 | QF   |
| 0 | MW   |
| 0 | PFPY |

---



Table S3

| P<br>e<br>p<br>t<br>i<br>d<br>e | SMILES                                                                                                    | H<br>G<br>N<br>N       | W<br>L<br>N              | Att<br>en<br>tiv<br>e<br>F<br>P | Gr<br>ap<br>h<br>S<br>AG<br>E |
|---------------------------------|-----------------------------------------------------------------------------------------------------------|------------------------|--------------------------|---------------------------------|-------------------------------|
| S<br>C                          | <chem>N[C@@H](CO)C(=O)N[C@@H](CS)C(=O)O</chem>                                                            | S<br>w<br>e<br>e<br>t  | 0 0<br>0 0<br>6 3<br>8 2 | B<br>it<br>t<br>e<br>r          | 0 0<br>0 0<br>2 7<br>2 8      |
| C<br>S                          | <chem>N[C@@H](CS)C(=O)N[C@@H](CO)C(=O)O</chem>                                                            | S<br>w<br>e<br>e<br>t  | 0 0<br>0 0<br>6 3<br>8 2 | B<br>it<br>t<br>e<br>r          | 0 0<br>0 0<br>4 5<br>8 2      |
| S<br>P                          | <chem>N[C@@H](CO)C(=O)N1CCC[C@H]1C(=O)O</chem>                                                            | B<br>it<br>t<br>e<br>r | 0 0<br>0 1<br>0 1<br>1 9 | B<br>it<br>t<br>e<br>r          | 0 0<br>0 1<br>4 5<br>4 6      |
| C<br>Q                          | <chem>NC(=O)CC[C@H](NC(=O)[C@@H](N)CS)C(=O)O</chem>                                                       | B<br>it<br>t<br>e<br>r | 0 0<br>0 0<br>2 7<br>5 5 | S<br>w<br>e<br>e<br>t           | 0 0<br>0 0<br>7 2<br>7 3      |
| G<br>D<br>M<br>D<br>Y           | <chem>CSCC[C@H](NC(=O)[C@H](CC(=O)O)NC(=O)CN)C(=O)N[C@@H](CC(=O)O)C(=O)N[C@@H](Cc1ccc(O)cc1)C(=O)O</chem> | B<br>it<br>t<br>e<br>r | 0 0<br>0 1<br>0 1<br>0 1 | B<br>it<br>t<br>e<br>r          | 0 0<br>0 1<br>1 8<br>8 2      |
| C<br>P<br>K                     | <chem>NCCCC[C@H](NC(=O)[C@@H]1CCCN1C(=O)[C@@H](N)CS)C(=O)O</chem>                                         | B<br>it<br>t<br>e<br>r | 0 0<br>0 1<br>0 1<br>0 1 | B<br>it<br>t<br>e<br>r          | 0 0<br>0 1<br>0 1<br>0 1      |
| C<br>S<br>R                     | <chem>N=C(N)NCCCC[C@H](NC(=O)[C@H](CO)NC(=O)CNC(=O)[C@@H](N)CS)C(=O)O</chem>                              | B<br>it<br>t<br>e<br>r | 0 0<br>0 0<br>0 9<br>6 4 | B<br>it<br>t<br>e<br>r          | 0 0<br>0 0<br>0 9<br>1 9      |
| G<br>L<br>P                     | <chem>CC(C)C[C@H](NC(=O)CN)C(=O)N1CCC[C@H]1C(=O)N[C@@H](CCCCN)C(=O)O</chem>                               | B<br>it<br>t<br>e<br>r | 0 0<br>0 1<br>0 1<br>0 1 | B<br>it<br>t<br>e<br>r          | 0 0<br>0 1<br>0 1<br>0 1      |

[illegible]

|    |                                      |             |         |             |
|----|--------------------------------------|-------------|---------|-------------|
| G  |                                      | e 9 0 e     | t 9 0 t | 9 0         |
|    |                                      | e 8 2 e     | 3 7     | 3 7         |
|    |                                      | t           | t       |             |
|    |                                      | B           | B       |             |
| N  | NC(=O)C[C@H](N)C(=O)NCC(=O)N[C@@H]   | it          | it      | 0 0         |
| G  | (CC(=O)O)C(=O)N[C@@H](Cc1c[nH]c2cccc | t 0 1 t     | 0 1 Bit | . . Bit 0 0 |
| D  | c12)C(=O)O                           | e           | e       | 0 9 ter . . |
| W  |                                      | r           | r       | 9 1 4 6     |
|    |                                      | B           | B       |             |
|    |                                      | it 0 0      | it 0 0  | 0 0         |
| G  | N=C(N)NCCC[C@H](NC(=O)CN)C(=O)O      | t . . t . . | Sw      | . . Bit     |
| R  |                                      | e 0 9 e 0 9 | ee      | 7 2 ter 0 1 |
|    |                                      | r 3 7 r 6 4 | t 4 6   |             |
|    |                                      | B           | B       |             |
| L  | CC(C)C[C@H](N)C(=O)NCC(=O)N1CCC[C@   | it          | it      |             |
| G  | H]1C(=O)N[C@@H](CCCCN)C(=O)O         | t 0 1 t 0 1 | Bit     | 0 1 Bit 0 1 |
| P  |                                      | e           | e       |             |
| K  |                                      | r           | r       |             |
|    |                                      | B           | B       |             |
|    |                                      | it 0 0      | it 0 0  | 0 0         |
| G  | N=C(N)NCCC[C@H](NC(=O)CNC(=O)CN)C(=  | t . . t . . | Sw      | . . Bit . . |
| G  | O)O                                  | e 0 9 e 0 9 | ee      | 6 3 ter 0 9 |
| R  |                                      | r 1 9 r 7 3 | t 4 6   | 1 9         |
|    |                                      | B           | B       |             |
| IN | CC[C@H](C)[C@H](N)C(=O)N[C@@H](CC(   | it          | it      | 0 0         |
| P  | N)=O)C(=O)N1CCC[C@H]1C(=O)N[C@@H]    | t 0 1 t 0 1 | Bit     | . . Bit 0 1 |
| Y  | (Cc1ccc(O)cc1)C(=O)N1CCC[C@H]1C(=O)N | e           | e       | 0 9 ter 1 9 |
| P  | [C@@H](CCCNC(=N)N)C(=O)O             | r           | r       |             |
| R  |                                      | B           | B       |             |
|    |                                      | it 0 0      | it 0 0  | 0 0         |
| C  | N=C(N)NCCC[C@H](NC(=O)[C@H](CCC(N)=  | t . . t . . | Bit     | . . Bit . . |
| Q  | O)NC(=O)[C@@H](N)CS)C(=O)O           | e 1 9 e 0 9 | ter     | 2 7 ter 0 9 |
| R  |                                      | r           | r       | 4 6 7 3 6 4 |
|    |                                      | B           | B       |             |
|    |                                      | it 0 0      | it 0 0  | 0 0         |
| N  | CC[C@H](C)[C@H](NC(=O)[C@H](CCSC)NC  | t . . t . . | Bit     | . . Bit . . |
| G  | (=O)CNC(=O)[C@@H](N)CC(N)=O)C(=O)N[  | e 0 9 e 0 9 | ter     | 2 7 ter 0 9 |
| M  | C@@H](CCCNC(=N)N)C(=O)O              | r 2 8 r 2 8 |         | 6 4 1 9     |
| IR |                                      | B           | B       |             |
|    |                                      | it          | it      |             |
|    |                                      | t 0 1 t 0 1 | Bit     | . . Bit . . |
| Q  | CSCC[C@H](NC(=O)[C@H](Cc1c[nH]c2cccc | e           | e       | 0 0         |
| W  | c12)NC(=O)[C@@H](N)CCC(N)=O)C(=O)N[  | r           | r       | . . Bit . . |
| M  | C@@H](CCC(=O)O)C(=O)O                |             |         | 1 8 ter 0 9 |
| E  |                                      |             |         | 5 5 9 1     |
|    |                                      | B           | B       |             |
| Y  | N=C(N)NCCC[C@H](NC(=O)[C@@H]1CCCN    | B 0 1 B 0 1 | Bit     | 0 0 Bit 0 1 |

|    |                                      |    |   |    |    |     |     |     |     |     |     |
|----|--------------------------------------|----|---|----|----|-----|-----|-----|-----|-----|-----|
| P  | 1C(=O)[C@@H](N)Cc1ccc(O)cc1)C(=O)O   | it |   | it |    | ter | .   | .   | ter |     |     |
| R  |                                      | t  |   | t  |    |     | 0   | 9   |     |     |     |
|    |                                      | e  |   | e  |    |     | 1   | 9   |     |     |     |
|    |                                      | r  |   | r  |    |     |     |     |     |     |     |
|    |                                      | B  |   | B  | 0  | 0   |     | 0   | 0   |     | 0   |
| D  | N[C@@H](CC(=O)O)C(=O)N[C@@H](Cc1c[   | it |   | it | .  | .   | Bit | .   | .   | Bit | .   |
| W  | nH]c2cccc12)C(=O)O                   | t  | 0 | 1  | t  | 3   | 6   | ter | 1   | 8   | ter |
|    |                                      | e  |   | e  | 9  | 1   |     |     | 6   | 4   |     |
|    |                                      | r  |   | r  |    |     |     |     |     |     | 5   |
|    |                                      | B  |   | B  |    |     |     |     |     |     | 5   |
| C  | N[C@@H](CS)C(=O)N[C@@H](CC(=O)O)C(   | it | 0 | 0  | it |     |     |     | 0   | 0   |     |
| D  | =O)NCC(=O)N[C@@H](Cc1ccc(O)cc1)C(=O) | t  | . | .  | t  | 0   | 1   | Bit | .   | .   | Bit |
| G  | O                                    | e  | 1 | 8  | e  |     |     | ter | 1   | 8   | ter |
| Y  |                                      | r  | 5 | 5  | r  |     |     |     | 5   | 5   |     |
|    |                                      | B  |   | B  |    |     |     |     |     |     | 9   |
|    |                                      | it |   | it |    |     |     |     |     |     | 1   |
| IS | CC[C@H](C)[C@H](N)C(=O)N[C@@H](CO)   | t  | 0 | 0  | t  |     |     |     | 0   | 0   |     |
| C  | C(=O)N[C@@H](CS)C(=O)N[C@@H](CCCN    | e  | . | .  | e  | 0   | 1   | Bit | .   | .   | Bit |
| R  | C(=N)N)C(=O)O                        | r  | 0 | 9  | r  |     |     | ter | 0   | 9   | ter |
|    |                                      | B  | 7 | 3  | B  |     |     |     | 4   | 6   |     |
|    |                                      | it |   | it |    |     |     |     |     |     | 0   |
| D  | N[C@@H](CC(=O)O)C(=O)NCC(=O)N[C@@    | t  | 0 | 0  | t  | 0   | 0   |     | 0   | 0   |     |
| G  | H](Cc1cccc1)C(=O)O                   | e  | . | .  | e  | .   | .   | Bit | .   | .   | Sw  |
| F  |                                      | r  | 2 | 7  | r  | 8   | 1   | ter | 3   | 6   | ee  |
|    |                                      | B  | 8 | 2  | B  | 2   | 8   |     | 9   | 1   | t   |
|    |                                      | it |   | it |    |     |     |     |     |     | 0   |
| E  | N[C@@H](CCC(=O)O)C(=O)N[C@@H](Cc1    | t  | 0 | 0  | t  | 0   | 0   |     | 0   | 0   |     |
| W  | c[nH]c2cccc12)C(=O)O                 | e  | . | .  | e  | .   | .   | Bit | .   | .   | Bit |
|    |                                      | r  | 0 | 9  | r  | 0   | 9   | ter | 1   | 8   | ter |
|    |                                      | B  | 2 | 8  | B  | 3   | 7   |     | 1   | 9   |     |
|    |                                      | it |   | it |    |     |     |     |     |     | 2   |
| C  | N=C(N)NCCC[C@H](NC(=O)[C@@H](N)CS)   | t  | 0 | 0  | t  |     |     | Sw  | .   | .   | Bit |
| R  | C(=O)O                               | e  | 0 | 9  | e  | 2   | 7   | ee  | 6   | 3   | ter |
|    |                                      | r  | 8 | 2  | r  | 8   | 2   | t   | 9   | 1   |     |
|    |                                      | B  |   | B  |    |     |     |     |     |     | 0   |
| V  | CC(C)[C@H](N)C(=O)N[C@@H](CC(=O)O)C  | it |   | it |    |     |     |     | 0   | 0   |     |
| D  | (=O)N[C@@H](Cc1c[nH]c2cccc12)C(=O)O  | t  | 0 | 1  | t  | 0   | 1   | Bit | .   | .   | Bit |
| W  |                                      | e  |   | e  |    |     |     | ter | 0   | 9   | ter |
|    |                                      | r  |   | r  |    |     |     |     | 3   | 7   |     |
|    |                                      | B  |   | B  |    |     |     |     |     |     | 4   |
|    |                                      | it |   | it |    |     |     |     |     |     | 6   |
| R  | N=C(N)NCCC[C@H](N)C(=O)N1CCC[C@H]1   | t  | 0 | 1  | t  | 0   | 1   | Bit | .   | .   | Bit |
| P  | C(=O)N[C@@H](Cc1ccc(O)cc1)C(=O)O     | e  |   | e  |    |     |     | ter | 0   | 9   | ter |
| Y  |                                      | r  |   | r  |    |     |     |     | 1   | 9   |     |

|      |                                                                                                |     |   |   |     |   |   |     |   |   |     |   |   |
|------|------------------------------------------------------------------------------------------------|-----|---|---|-----|---|---|-----|---|---|-----|---|---|
| IGR  | <chem>CC[C@H](C)[C@H](N)C(=O)NCC(=O)N[C@@H](CCCNC(=N)N)C(=O)O</chem>                           | Bit | 0 | 0 | Bit | 0 | 0 | Sw  | 0 | 0 | Bit | 0 | 1 |
|      |                                                                                                | t   | . | . | t   | . | . | ee  | . | . | ter |   |   |
|      |                                                                                                | e   | 0 | 9 | e   | 1 | 9 | t   | 5 | 4 |     |   |   |
|      |                                                                                                | r   | 1 | 9 | r   |   |   |     | 4 | 6 |     |   |   |
| PDF  | <chem>O=C(O)C[C@H](NC(=O)[C@@H]1CCCN1)C(=O)N[C@@H](Cc1ccccc1)C(=O)O</chem>                     | Bit | 0 | 0 | Bit | 0 | 0 |     | 0 | 0 |     | 0 | 0 |
|      |                                                                                                | t   | . | . | t   | . | . | Bit | . | . | Bit | . | . |
|      |                                                                                                | e   | 2 | 8 | e   | 4 | 5 | ter | 0 | 9 | ter | 4 | 5 |
|      |                                                                                                | r   |   |   | r   | 7 | 3 |     | 3 | 7 |     | 9 | 1 |
| LDMP | <chem>CSCC[C@H](NC(=O)[C@H](CC(=O)O)NC(=O)[C@@H](N)CC(C)C)C(=O)NCC(=O)N1CCC[C@H]1C(=O)O</chem> | Bit |   |   | Bit | 0 | 0 |     |   |   |     | 0 | 0 |
|      |                                                                                                | t   | 0 | 1 | t   | . | . | Bit |   |   | Bit | . | . |
|      |                                                                                                | e   |   |   | e   | 0 | 9 | ter | 0 | 1 | ter | 0 | 9 |
|      |                                                                                                | r   |   |   | r   | 2 | 8 |     |   |   |     | 6 | 4 |
| DCY  | <chem>N[C@@H](CC(=O)O)C(=O)N[C@@H](CS)C(=O)N[C@@H](Cc1ccc(O)cc1)C(=O)O</chem>                  | Bit | 0 | 0 | Bit | 0 | 0 |     | 0 | 0 | Sw  | 0 | 0 |
|      |                                                                                                | t   | . | . | t   | . | . | Bit | . | . | ee  | . | . |
|      |                                                                                                | e   | 4 | 5 | e   | 0 | 9 | ter | 1 | 8 | t   | 6 | 3 |
|      |                                                                                                | r   | 1 | 9 | r   | 6 | 4 |     | 9 | 1 |     | 4 | 6 |
| DNF  | <chem>NC(=O)C[C@H](NC(=O)[C@@H](N)CC(=O)O)C(=O)N[C@@H](Cc1ccccc1)C(=O)O</chem>                 | Bit | 0 | 0 | Bit | 0 | 0 |     | 0 | 0 |     | 0 | 0 |
|      |                                                                                                | t   | . | . | t   | . | . | Bit | . | . | Bit | . | . |
|      |                                                                                                | e   | 0 | 9 | e   | 2 | 7 | ter | 2 | 7 | ter | 3 | 6 |
|      |                                                                                                | r   | 1 | 9 | r   | 1 | 9 |     | 6 | 4 |     | 2 | 8 |
| AMR  | <chem>CSCC[C@H](NC(=O)[C@H](C)N)C(=O)N[C@@H](CCCNC(=N)N)C(=O)O</chem>                          | Bit | 0 | 0 | Bit |   |   |     | 0 | 0 |     | 0 | 0 |
|      |                                                                                                | t   | . | . | t   | 0 | 1 | Bit | . | . | Bit | . | . |
|      |                                                                                                | e   | 0 | 9 | e   |   |   | ter | 3 | 6 | ter | 0 | 9 |
|      |                                                                                                | r   | 4 | 6 | r   |   |   |     | 9 | 1 |     | 1 | 9 |
| DLP  | <chem>CC(C)C[C@H](NC(=O)[C@@H](N)CC(=O)O)C(=O)N1CCC[C@H]1C(=O)O</chem>                         | Bit |   |   | Bit | 0 | 0 |     |   |   |     | 0 | 0 |
|      |                                                                                                | t   | 0 | 1 | t   | . | . | Bit |   |   | Bit | . | . |
|      |                                                                                                | e   |   |   | e   | 0 | 9 | ter | 0 | 1 | ter | 0 | 9 |
|      |                                                                                                | r   |   |   | r   | 4 | 6 |     |   |   |     | 4 | 6 |
| EMW  | <chem>CSCC[C@H](NC(=O)[C@@H](N)CCC(=O)O)C(=O)N[C@@H](Cc1c[nH]c2ccccc12)C(=O)O</chem>           | Bit | 0 | 0 | Bit | 0 | 0 |     | 0 | 0 |     | 0 | 0 |
|      |                                                                                                | t   | . | . | t   | . | . | Bit | . | . | Bit | . | . |
|      |                                                                                                | e   | 0 | 9 | e   | 0 | 9 | ter | 1 | 8 | ter | 1 | 9 |
|      |                                                                                                | r   | 2 | 8 | r   | 1 | 9 |     | 5 | 5 |     |   |   |
| MGD  | <chem>CSCC[C@H](N)C(=O)NCC(=O)N[C@@H](CC(=O)O)C(=O)O</chem>                                    | Bit | 0 | 0 | S   | 0 | 0 | Sw  | 0 | 0 | Sw  | 0 | 0 |
|      |                                                                                                | t   | . | . | w   | . | . | ee  | . | . | ee  | . | . |
|      |                                                                                                | e   | 2 | 7 | e   | 6 | 3 | t   | 9 | 0 | t   | 8 | 1 |
|      |                                                                                                | r   | 9 | 1 | r   | 2 | 8 |     | 4 | 6 |     | 5 | 5 |

[illegible]

|    |                                     |    |   |   |    |   |   |     |   |   |     |   |   |
|----|-------------------------------------|----|---|---|----|---|---|-----|---|---|-----|---|---|
|    |                                     | e  | 2 | 8 | e  | 1 | 9 |     | 5 | 5 |     |   |   |
|    |                                     | r  |   |   | r  |   |   |     |   |   |     |   |   |
|    |                                     | B  |   |   | B  |   |   |     |   |   |     |   |   |
| M  | CSCC[C@H](N)C(=O)N[C@H](C(=O)N1CCC[ | it |   |   | it |   |   |     |   |   |     |   |   |
| T  | C@H]1C(=O)N[C@@H](CCCNC(=N)N)C(=O   | t  | 0 | 1 | t  | 0 | 1 | Bit | 0 | 1 | Bit | 0 | 1 |
| P  | )O][C@@H](C)O                       | e  |   |   | e  |   |   | ter |   |   | ter |   |   |
| R  |                                     | r  |   |   | r  |   |   |     |   |   |     |   |   |
|    |                                     | B  |   |   | B  |   |   |     |   |   |     |   |   |
| M  | CSCC[C@H](N)C(=O)N[C@@H](CC(=O)O)C( | it | 0 | 0 | it | 0 | 0 |     | 0 | 0 | Sw  | 0 | 0 |
| D  | =O)N[C@@H](Cc1cccc1)C(=O)O          | t  | . | . | t  | . | . | Bit | . | . | ee  | . | . |
| F  |                                     | e  | 3 | 6 | e  | 2 | 7 | ter | 4 | 6 | t   | 6 | 3 |
|    |                                     | r  | 9 | 1 | r  | 3 | 7 |     |   |   |     | 1 | 9 |
|    |                                     | B  |   |   | B  |   |   |     |   |   |     |   |   |
| R  | N=C(N)NCCC[C@H](N)C(=O)N1CCC[C@H]1  | it |   |   | it |   |   |     | 0 | 0 |     |   |   |
| P  | C(=O)N[C@@H](Cc1cccc1)C(=O)O        | t  | 0 | 1 | t  | 0 | 1 | Bit | . | . | Bit | 0 | 1 |
| F  |                                     | e  |   |   | e  |   |   | ter | 0 | 9 | ter |   |   |
|    |                                     | r  |   |   | r  |   |   |     | 1 | 9 |     |   |   |
|    |                                     | B  |   |   | B  |   |   |     |   |   |     |   |   |
| M  | CSCC[C@H](N)C(=O)N[C@@H](CC(=O)O)C( | it | 0 | 0 | it | 0 | 0 |     | 0 | 0 | Sw  | 0 | 0 |
| D  | =O)N[C@@H](CO)C(=O)N[C@@H](Cc1cccc  | t  | . | . | t  | . | . | Bit | . | . | ee  | . | . |
| SF | c1)C(=O)O                           | e  | 2 | 7 | e  | 0 | 9 | ter | 1 | 8 | t   | 8 | 1 |
|    |                                     | r  | 3 | 7 | r  | 8 | 2 |     | 4 | 6 |     | 5 | 5 |

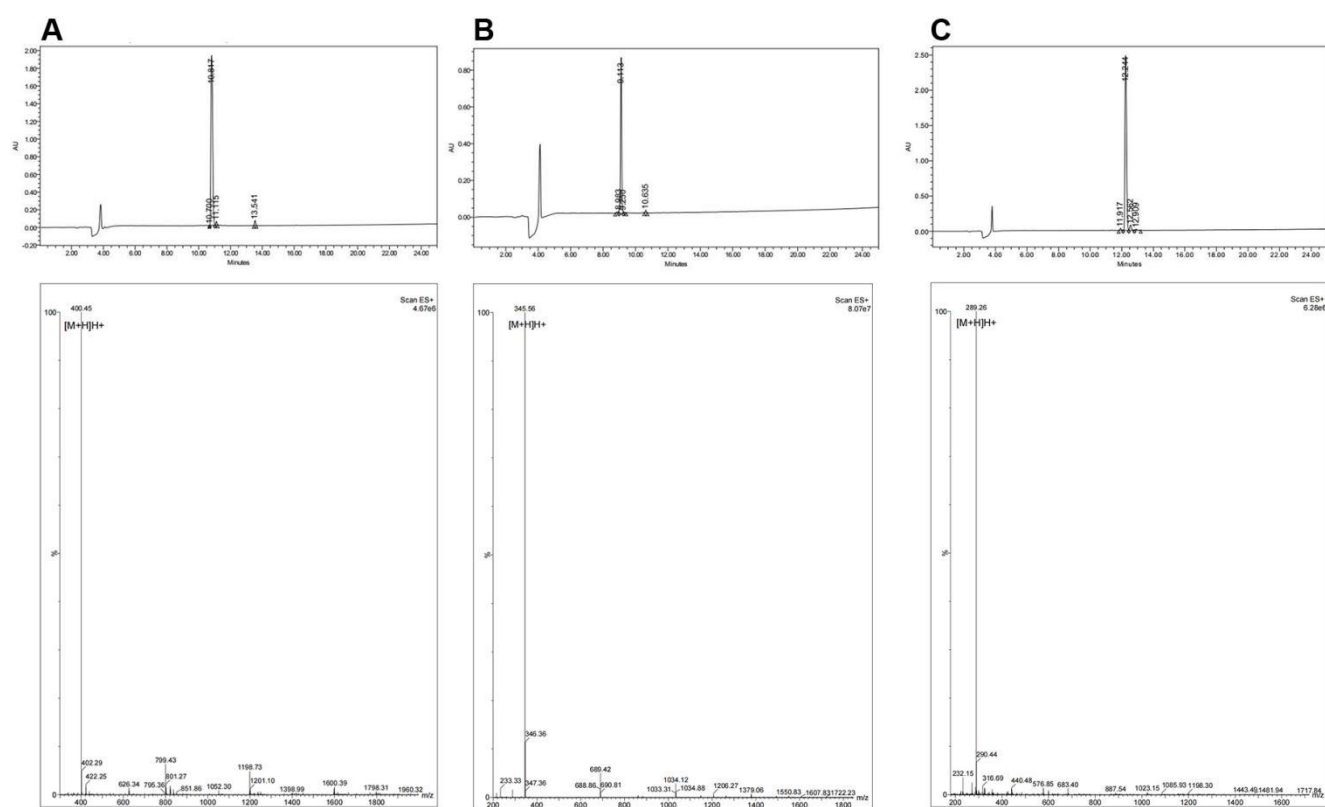

Figure S1 The results of HPLC-MS. A:DCY B: IGR C:GGR.



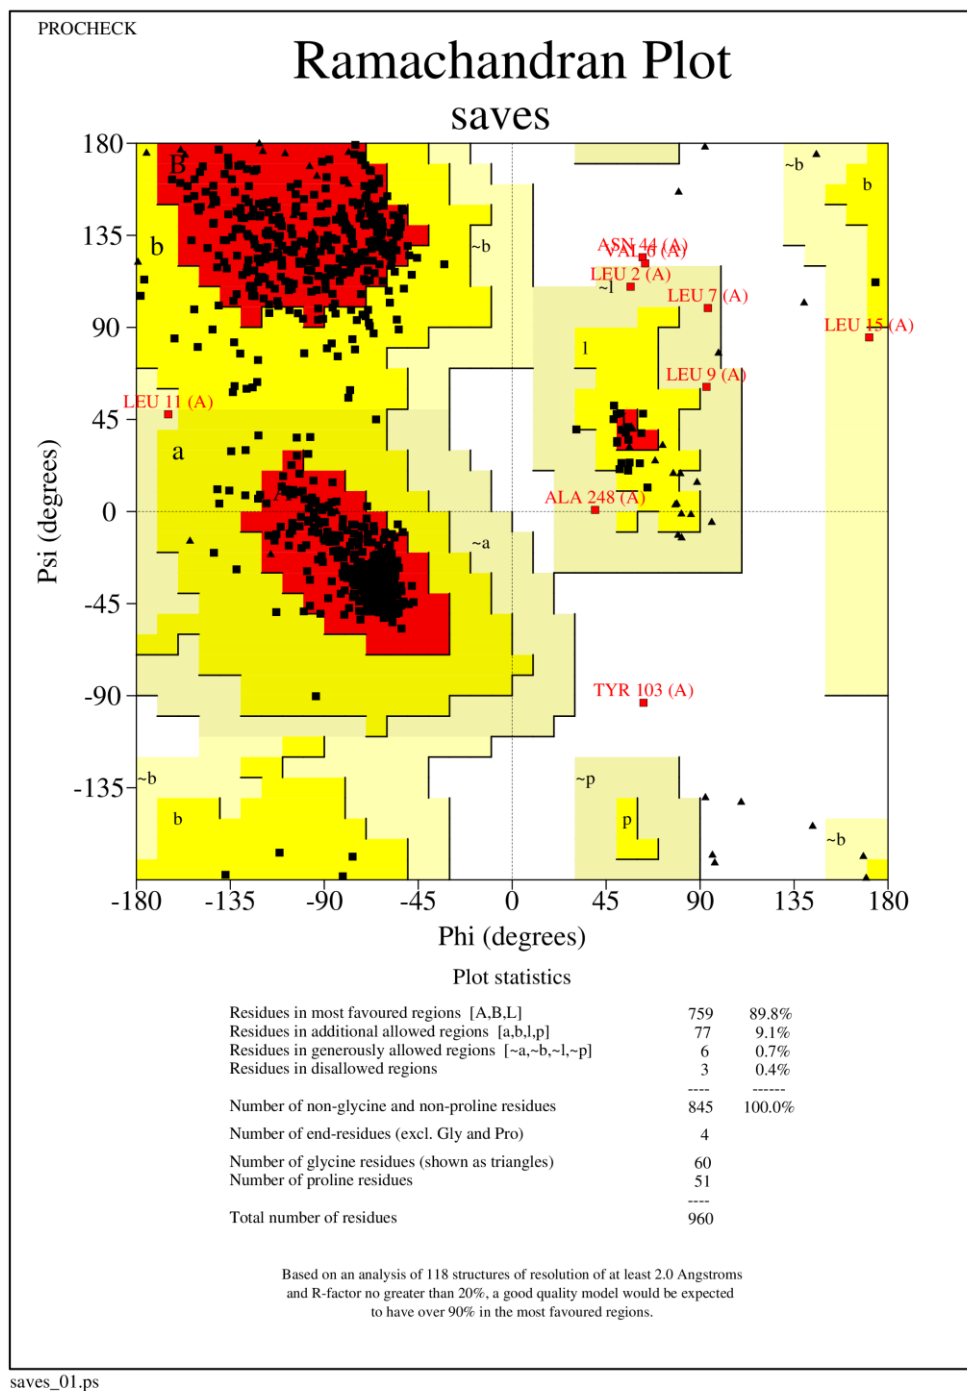

Figure S2 The Ramachandran plot validation of the developed structures.
